# Supplementary figures and images for: Sustained Elevated Blood Pressure Accelerates Atherosclerosis Development in a Preclinical Model of Disease
Source: MDPI journal article supplement (doi:10.3390/ijms22168448), 2021-08-06

Supplementary Figure S1

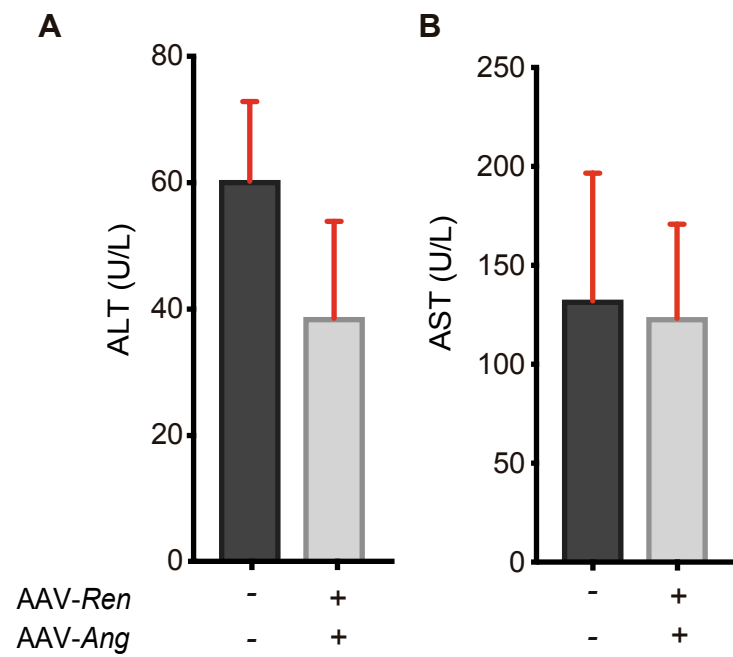

Supplement: s1 [file s1]
